# Supplementary material for: Personalised mapping of tumour development in synchronous colorectal cancer patients
Source: PubMed Central journal article supplement (PMC7335056; doi:10.1038/s41525-020-0134-3), 2020-07-03
Supplement: 41525_2020_134_MOESM1_ESM.pdf [file 41525_2020_134_MOESM1_ESM.pdf]

**Supplementary Table 1.** Mutation burdens (SNVs, InDels, SVs), chromosomal instability status (CIN), proportion of MMR-deficiency related signatures (Sig. 6, Sig. 15, Sig. 20, Sig. 26) and relative MS status (MS), together with evidence of *Fusobacterium nucleatum* (Fuso) and subtype classification (based on CMS classifier and CRIS classifier) are reported for each tumour sample in patient A (A1 and A2), patient B (B1 to B5) and patient C (C1 to C5).

| Tumour | SNVs   | InDels | SVs | CIN  | MMR_sigs | Fuso | MS_status | CMS  | CRIS   |
|--------|--------|--------|-----|------|----------|------|-----------|------|--------|
| A1     | 15839  | 1372   | 187 | High | 0        | No   | MSS       | CMS4 | CRIS-B |
| A2     | 11700  | 253    | 37  | High | 0        | No   | MSS       | CMS4 | CRIS-B |
| B1     | 128624 | 99165  | 82  | Low  | 0.57     | Yes  | MSI       | CMS2 | CRIS-E |
| B2     | 137831 | 104406 | 69  | Low  | 0.45     | Yes  | MSI       | NA   | CRIS-A |
| B3     | 150129 | 107202 | 102 | Low  | 0.6      | Yes  | MSI       | NA   | CRIS-A |
| B4     | 220430 | 155498 | 139 | Low  | 0.35     | Yes  | MSI       | CMS3 | CRIS-A |
| B5     | 29013  | 2543   | 144 | High | 0        | Yes  | MSS       | CMS2 | CRIS-E |
| C1     | 226130 | 105426 | 82  | Low  | 0.71     | Yes  | MSI       | CMS4 | CRIS-D |
| C2     | 177103 | 128273 | 58  | Low  | 0.29     | Yes  | MSI       | CMS2 | CRIS-E |
| C3     | 172029 | 95837  | 83  | Low  | 0.33     | Yes  | MSI       | NA   | CRIS-D |
| C4     | 130917 | 95516  | 217 | Low  | 0.37     | Yes  | MSI       | NA   | CRIS-C |
| C5     | 219246 | 165272 | 204 | Low  | 0.39     | Yes  | MSI       | CMS1 | CRIS-C |

## Supplementary Figure Legends

**Supplementary Figure 1.** (A) A Venn diagram showing the overlap of InDels between tumours. (B) A Venn diagram showing the overlap of SVs between tumours. (C) Tumours mutational profiles of total SNVs, as defined by the weighted contributions of each input reference signature from COSMIC. (D) Values of tumour ploidy and tumour purity, as estimated by FACETS.

**Supplementary Figure 2.** (A) A Venn diagram showing the overlap of InDels between tumours. (B) A Venn diagram showing the overlap of SVs between tumours. (C) Tumours mutational profiles of total SNVs, as defined by the weighted contributions of each input reference signature from COSMIC. (D) Values of tumour ploidy and tumour purity, as estimated by FACETS.

**Supplementary Figure 3.** (A) A Venn diagram showing the overlap of InDels between tumours. (B) A Venn diagram showing the overlap of SVs between tumours. (C) IGV overview of the *BRAF* V600E mutation. (D) IGV overview of the *MSH6* gene. (E) Tumours mutational profiles of total SNVs, as defined by the weighted contributions of each input reference signature from COSMIC. (F) Values of tumour ploidy and tumour purity, as estimated by FACETS.

# Supplementary Figure 1

A

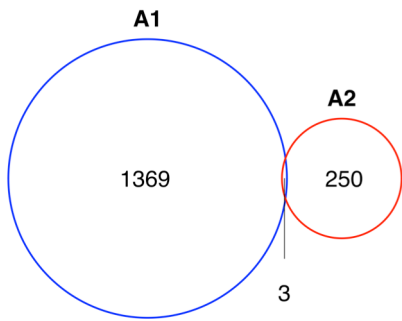

B

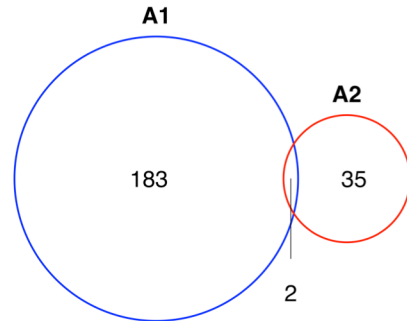

C

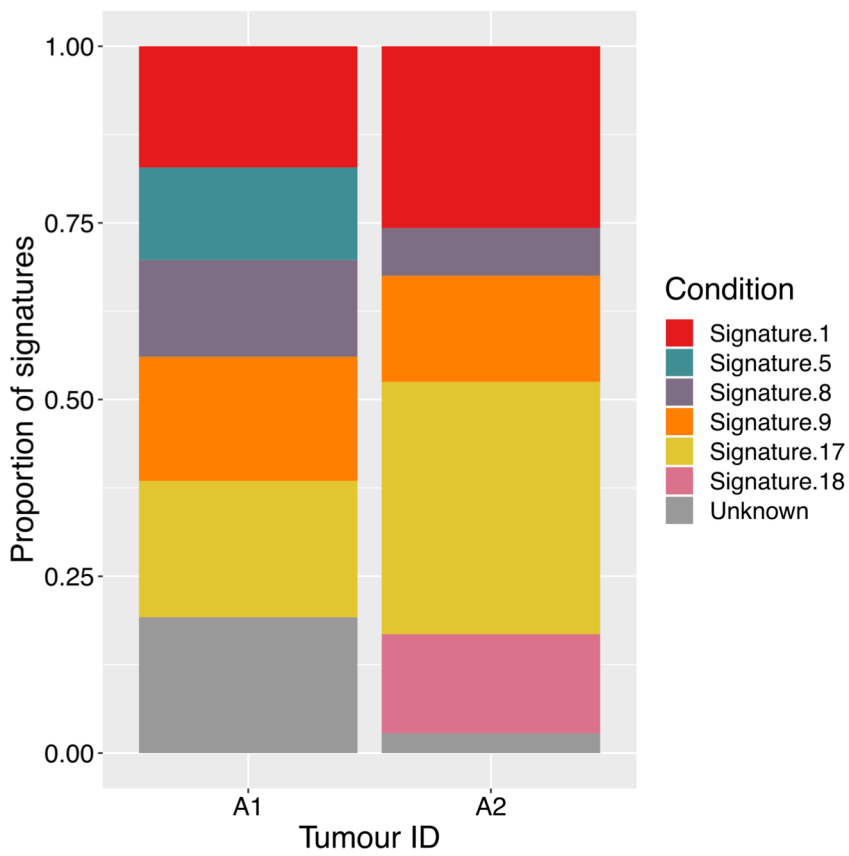

D

|    | Tumour ploidy | Tumour purity |
|----|---------------|---------------|
| A1 | 3.58          | 0.56          |
| A2 | 2.2           | 0.38          |

## Supplementary Figure 2

A

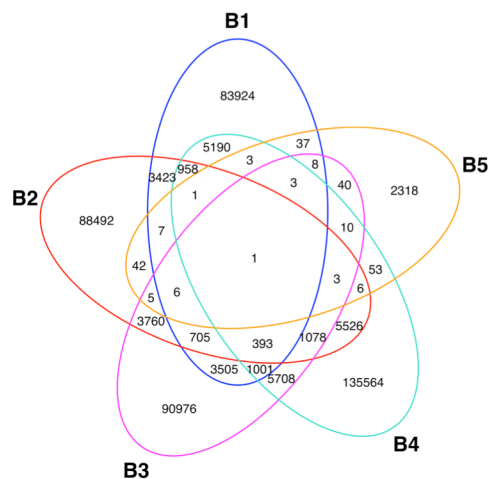

B

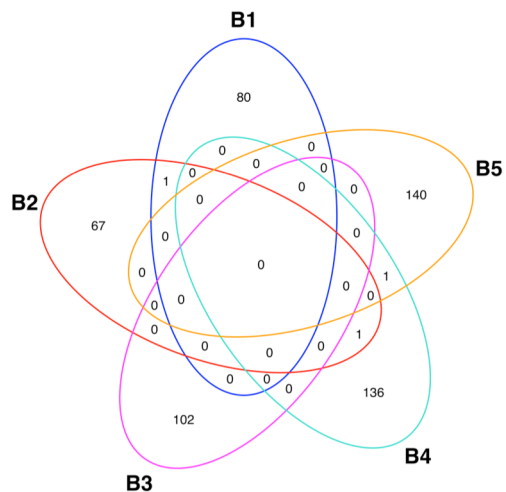

C

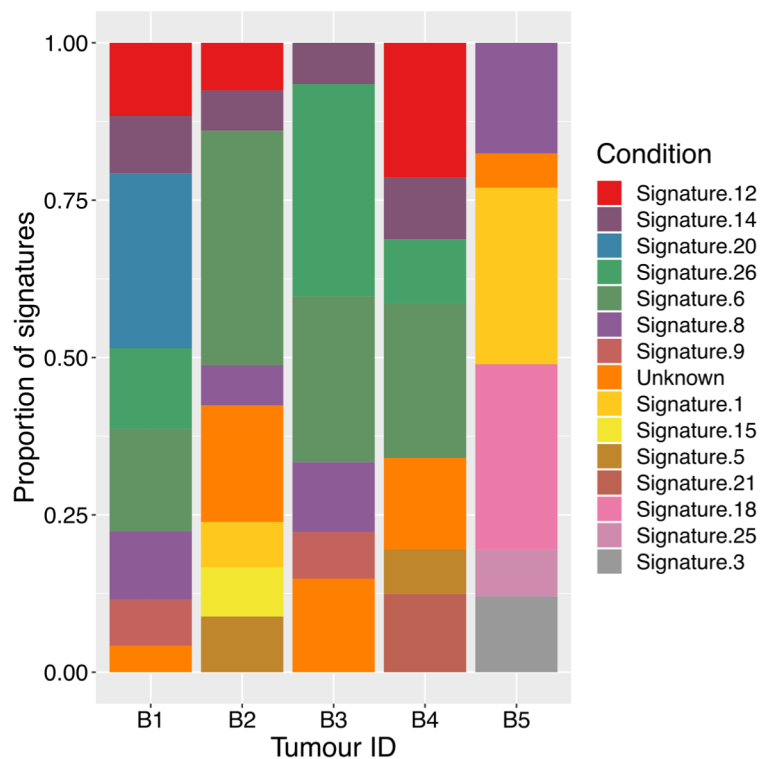

D

|    | Tumour ploidy | Tumour purity |
|----|---------------|---------------|
| B1 | 2             | 0.3           |
| B2 | 1.95          | 0.48          |
| B3 | 2             | 0.72          |
| B4 | 1.98          | 0.71          |
| B5 | 2.13          | 0.8           |

# Supplementary Figure 3

A

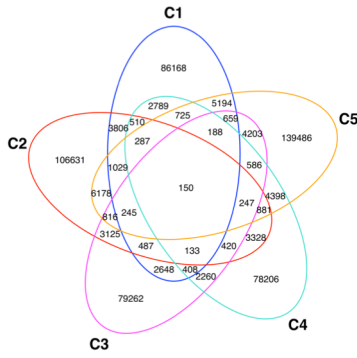

B

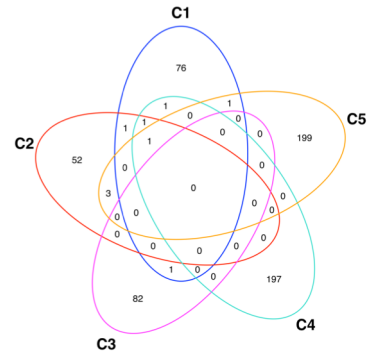

C

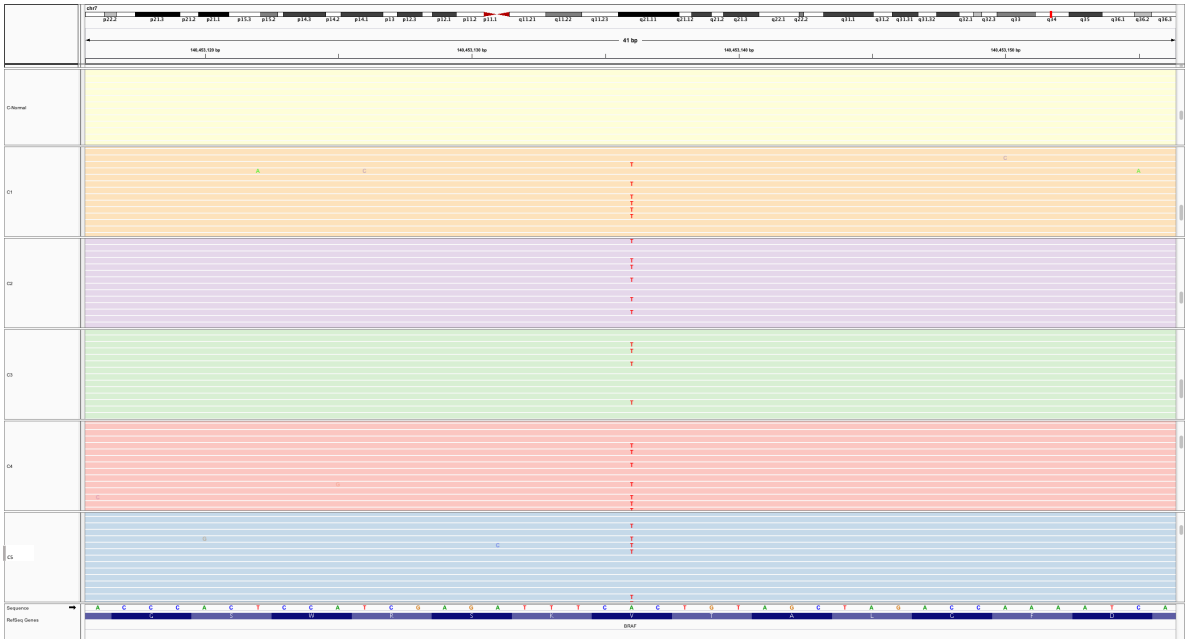

D

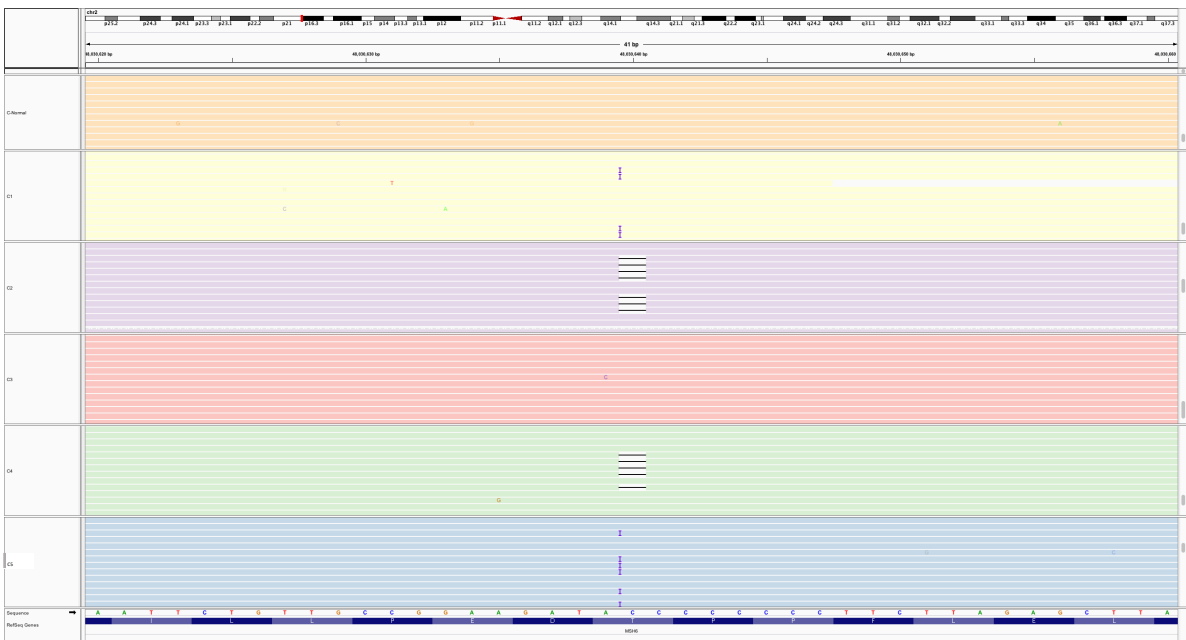

**E**

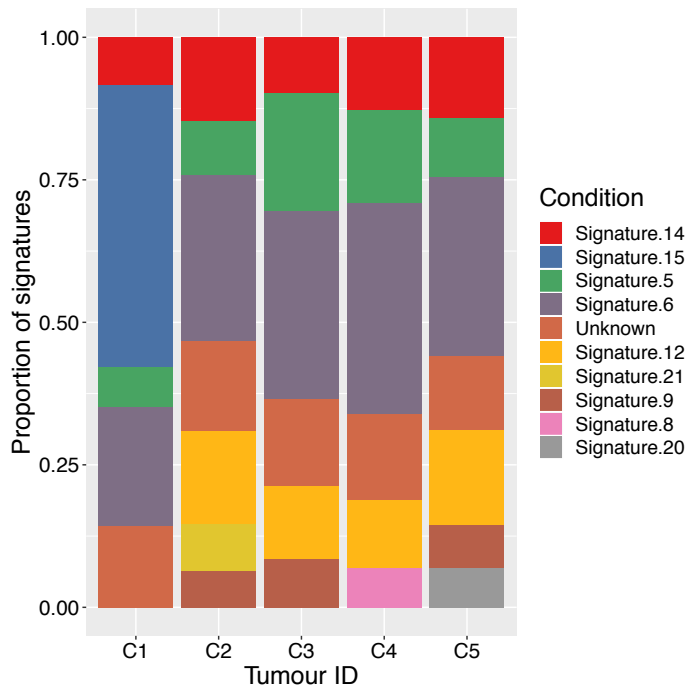

**F**

|    | Tumour ploidy | Tumour purity |
|----|---------------|---------------|
| C1 | 2.03          | 0.59          |
| C2 | 2.06          | 0.73          |
| C3 | 2.13          | 0.35          |
| C4 | 2.02          | 0.72          |
| C5 | 2.13          | 0.61          |
